# Supplementary material for: Efficient and Specific Detection ofSalmonellain Food Samples Using astn-Based Loop-Mediated Isothermal Amplification Method
Source: Hindawi journal article supplement (doi:10.1155/2015/356401), 2015-01-01
Supplement: f1 [file 356401.f1.pdf]

## Supplementary Material

The Supplementary Materials include 1 supplementary table and 5 supplementary figures as follows.

Supplementary Table S1: Specificity test for *stn* LAMP assays.

Supplementary Figure S1: The nucleotide sequence of *stn* gene and primers used for LAMP assay, arrows indicate the position and direction of DNA synthesis.

Supplementary Figure S2: Phylogenetic tree derived from the entire *stn* sequence of members of various genera of the family *Enterobacteriaceae* determined by the Neighbor-Joining method. Numbers within the dendrogram indicate the occurrence (%) of branching in the 2000 bootstrapped tree. Branches corresponding to partitions reproduced in less than 50% of bootstrap replicates are collapsed.

Supplementary Figure S3: Electrophoresis analysis of *stn* LAMP amplified products without loop primer (3A) and with loop primers (3B) using different reaction times. Lane M: 100 bp DNA ladder as size markers, lanes 1-12: LAMP carried out for 5, 10, 15, 20, 25, 30, 35, 40, 45, 50, 55 and 60 min, respectively; and lane 13: negative control (absence of DNA template).

Supplementary Figure S4: Specificity test for the *stn* LAMP assay. Lane M: 100 bp DNA ladder as size marker, lane 1: *S. Anatum*; lane 2: *S. Amsterdam*; lane 3: *S. Bangkok*; lane 4: *S. Choleraesuis*; lane 5: *S. Derby*; lane 6: *S. Enteritidis*, lane 7: *S. Paratyphi*, lane 8: *Citrobacter freundii*, lane 9: *Escherichia coli* K12, lane 10: *Enterococcus faecalis*, lane 11 *Enterobacter tarda*, lane 12: *Proteus vulgaris*, lane 13: *S. Typhimurium* ATCC 23566 as positive control, 14: negative control (no DNA template).

Supplementary Figure S5: Sensitivity of *stn* LAMP assays using purified DNA (A) and DNA from boiled cells (B). (A) Amount of purified DNA needed for detection of *stn* LAMP products. Lane M: 100 bp DNA ladder as size marker; lanes 1-6, reaction carried out using 5

fold-serial dilutions of standard genomic DNA at 3125 fg, 625 fg, 125 fg, 25 fg, 5 fg and 1 fg DNA/reaction, respectively; lane 7, negative control (no DNA template). (B) The number of *Salmonella* cells required for detection of *stn* by LAMP. Lane M: 100 bp DNA ladder as size marker; lanes 1-4, reaction carried out using DNA prepared directly from boil cells of  $10^3$ ,  $10^2$ , 10 and 1 cells/reaction, respectively; lane 5, negative control (no DNA template).

SUPPLEMENTARY TABLE S1: Specificity test for *stn* LAMP assays.

| Microorganisms                                    | No. of strains | LAMP |
|---------------------------------------------------|----------------|------|
| <i>Salmonella enterica</i> subsp. <i>enterica</i> |                |      |
| Serovar (I) Aberdeen                              | 1              | +    |
| Abony                                             | 1              | +    |
| Agona                                             | 1              | +    |
| Ajana                                             | 1              | +    |
| Alachua                                           | 1              | +    |
| Altona                                            | 1              | +    |
| Amsterdam                                         | 1              | +    |
| Anatum                                            | 3              | +    |
| Augustenborg                                      | 1              | +    |
| Bangkok                                           | 1              | +    |
| Bareilly                                          | 1              | +    |
| Berta                                             | 1              | +    |
| Blockley                                          | 1              | +    |
| Bovismorbificans                                  | 1              | +    |
| Braenderup                                        | 1              | +    |
| Brunei                                            | 1              | +    |
| Cerro                                             | 1              | +    |
| Chester                                           | 1              | +    |
| Choleraesuis                                      | 1              | +    |
| Circhow                                           | 1              | +    |
| Corvallis                                         | 1              | +    |
| Cubana                                            | 1              | +    |
| Derby                                             | 1              | +    |
| Dublin                                            | 1              | +    |
| Emek                                              | 1              | +    |
| Enteritidis                                       | 2              | +    |
| Falkensee                                         | 1              | +    |
| Farmsen                                           | 1              | +    |
| Gallinarum                                        | 1              | +    |
| Gera                                              | 1              | +    |
| Give                                              | 1              | +    |
| Hadar                                             | 1              | +    |
| Havana                                            | 1              | +    |
| Heidelberg                                        | 1              | +    |
| Hvittingfoss                                      | 1              | +    |
| Infantis                                          | 1              | +    |
| Isangi                                            | 1              | +    |

SUPPLEMENTARY TABLE S1: Specificity test for *stn* LAMP assays (continued).

| Microorganisms                                    | No. of strains | LAMP |
|---------------------------------------------------|----------------|------|
| <i>Salmonella enterica</i> subsp. <i>enterica</i> |                |      |
| Serovar (I) Javiana                               | 1              | +    |
| Kedougou                                          | 1              | +    |
| Kentucky                                          | 1              | +    |
| Krefeld                                           | 3              | +    |
| Langensalza                                       | 1              | +    |
| Lexington                                         | 1              | +    |
| Liverpool                                         | 1              | +    |
| Livingstone                                       | 1              | +    |
| London                                            | 1              | +    |
| Manhattan                                         | 1              | +    |
| Mbandaka                                          | 3              | +    |
| Molade                                            | 1              | +    |
| Montevideo                                        | 1              | +    |
| Muenchen                                          | 1              | +    |
| Newport                                           | 1              | +    |
| Ohio                                              | 1              | +    |
| Orion                                             | 2              | +    |
| Oslo                                              | 1              | +    |
| Panama                                            | 1              | +    |
| Paratyphi A                                       | 1              | +    |
| Paratyphi B                                       | 2              | +    |
| Poona                                             | 1              | +    |
| Potsdam                                           | 1              | +    |
| Rissen                                            | 1              | +    |
| Rubislaw                                          | 1              | +    |
| Saintpaul                                         | 1              | +    |
| Sandiego                                          | 1              | +    |
| Schwarzengrund                                    | 1              | +    |
| Senftenberg                                       | 1              | +    |
| Singapore                                         | 1              | +    |
| Stanley                                           | 1              | +    |
| Tennessee                                         | 1              | +    |
| Thompson                                          | 1              | +    |
| Typhi                                             | 1              | +    |
| Typhimurium                                       | 3              | +    |
| Urbana                                            | 1              | +    |
| Virchow                                           | 2              | +    |
| Wandswarth                                        | 1              | +    |

SUPPLEMENTARY TABLE S1: Specificity test for *stn* LAMP assays (continued).

| Microorganisms                                             | No. of strains | LAMP |
|------------------------------------------------------------|----------------|------|
| <i>Salmonella enterica</i> subsp. <i>enterica</i>          |                |      |
| Serovar (I) Waycross                                       | 1              | +    |
| Welikade                                                   | 1              | +    |
| Weltevreden                                                | 2              | +    |
| Westhampton                                                | 1              | +    |
| Wilmington                                                 | 1              | +    |
| Worthington                                                | 1              | +    |
| Yerba                                                      | 1              | +    |
| Zanzibar                                                   | 1              | +    |
| <i>Salmonella enterica</i> subsp. <i>salamae</i> (II)      | 3              | +    |
| <i>Salmonella enterica</i> subsp. <i>arizonae</i> (IIIa)   | 1              | +    |
| <i>Salmonella enterica</i> subsp. <i>diarizonae</i> (IIIb) | 1              | +    |
| <i>Salmonella enterica</i> subsp. <i>houtenae</i> (IV)     | 1              | +    |
| <i>Citrobacter diversus</i>                                | 3              | -    |
| <i>Citrobacter freundii</i>                                | 3              | -    |
| <i>Enterobacter tarda</i>                                  | 1              | -    |
| <i>Enterobacter aerogenes</i>                              | 1              | -    |
| <i>Enterobacter cloacae</i>                                | 3              | -    |
| <i>Enterococcus faecalis</i>                               | 1              | -    |
| <i>Escherichia coli</i>                                    | 17             | -    |
| <i>Klebsiella ozaenae</i>                                  | 1              | -    |
| <i>Klebsiella pneumoniae</i>                               | 10             | -    |
| <i>Morganella morganii</i>                                 | 1              | -    |
| <i>Proteus mirabilis</i>                                   | 1              | -    |
| <i>Proteus rettegeri</i>                                   | 1              | -    |
| <i>Proteus vulgaris</i>                                    | 1              | -    |
| <i>Serratia macescens</i>                                  | 1              | -    |
| <i>Shigella boydii</i>                                     | 1              | -    |
| <i>Shigella flexneri</i>                                   | 6              | -    |
| <i>Shigella sonnei</i>                                     | 4              | -    |

Note: + = Positive amplification

- = Negative amplification

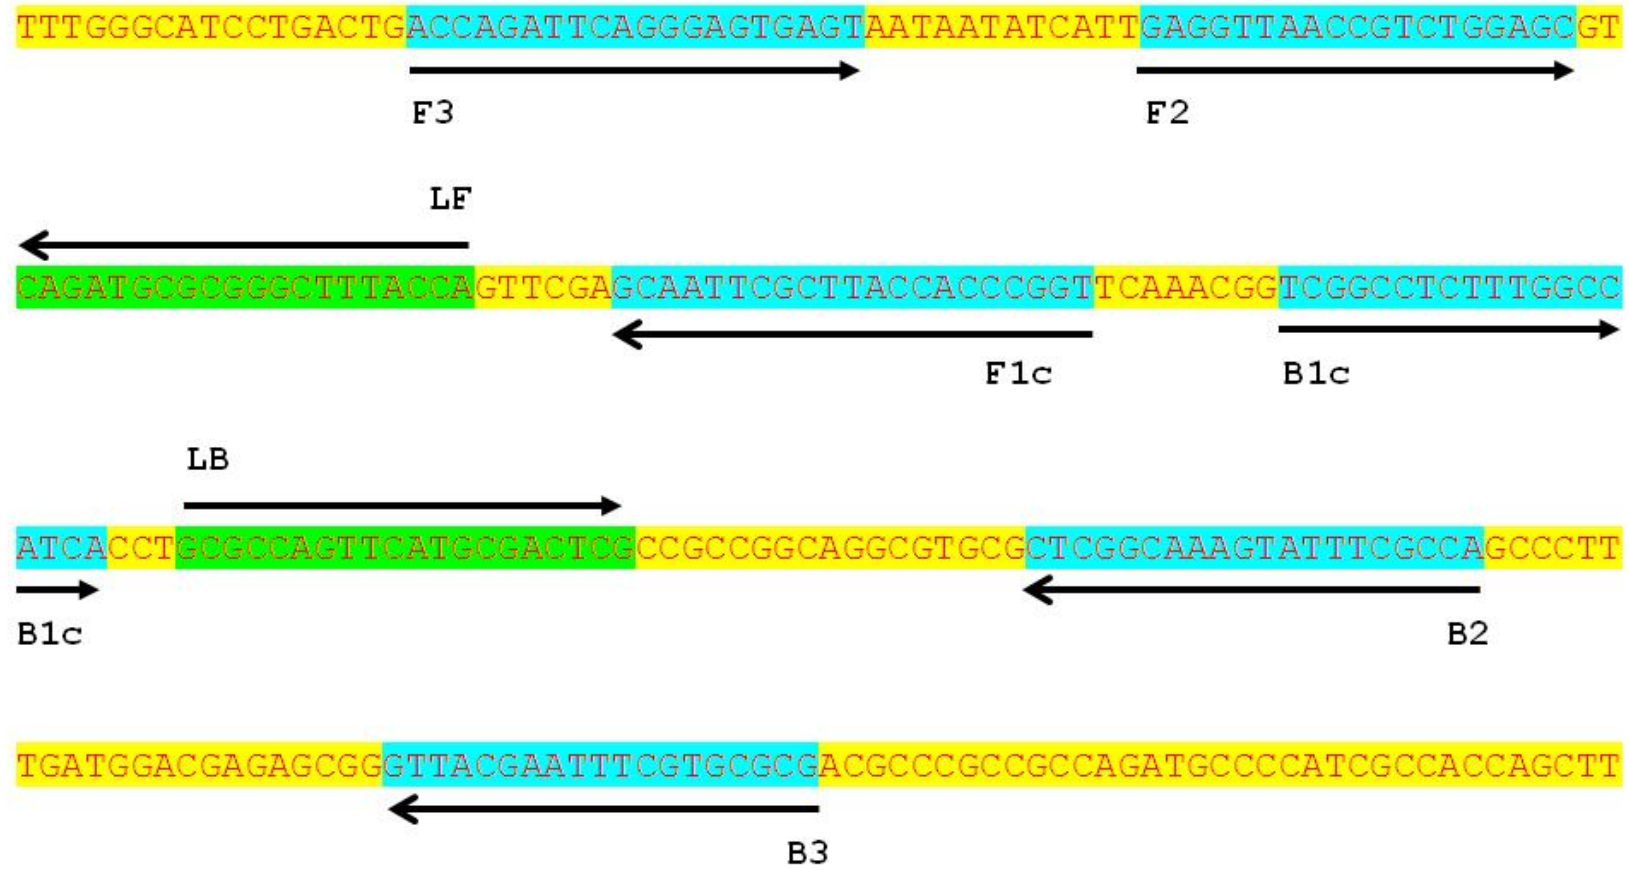

FIGURE S1

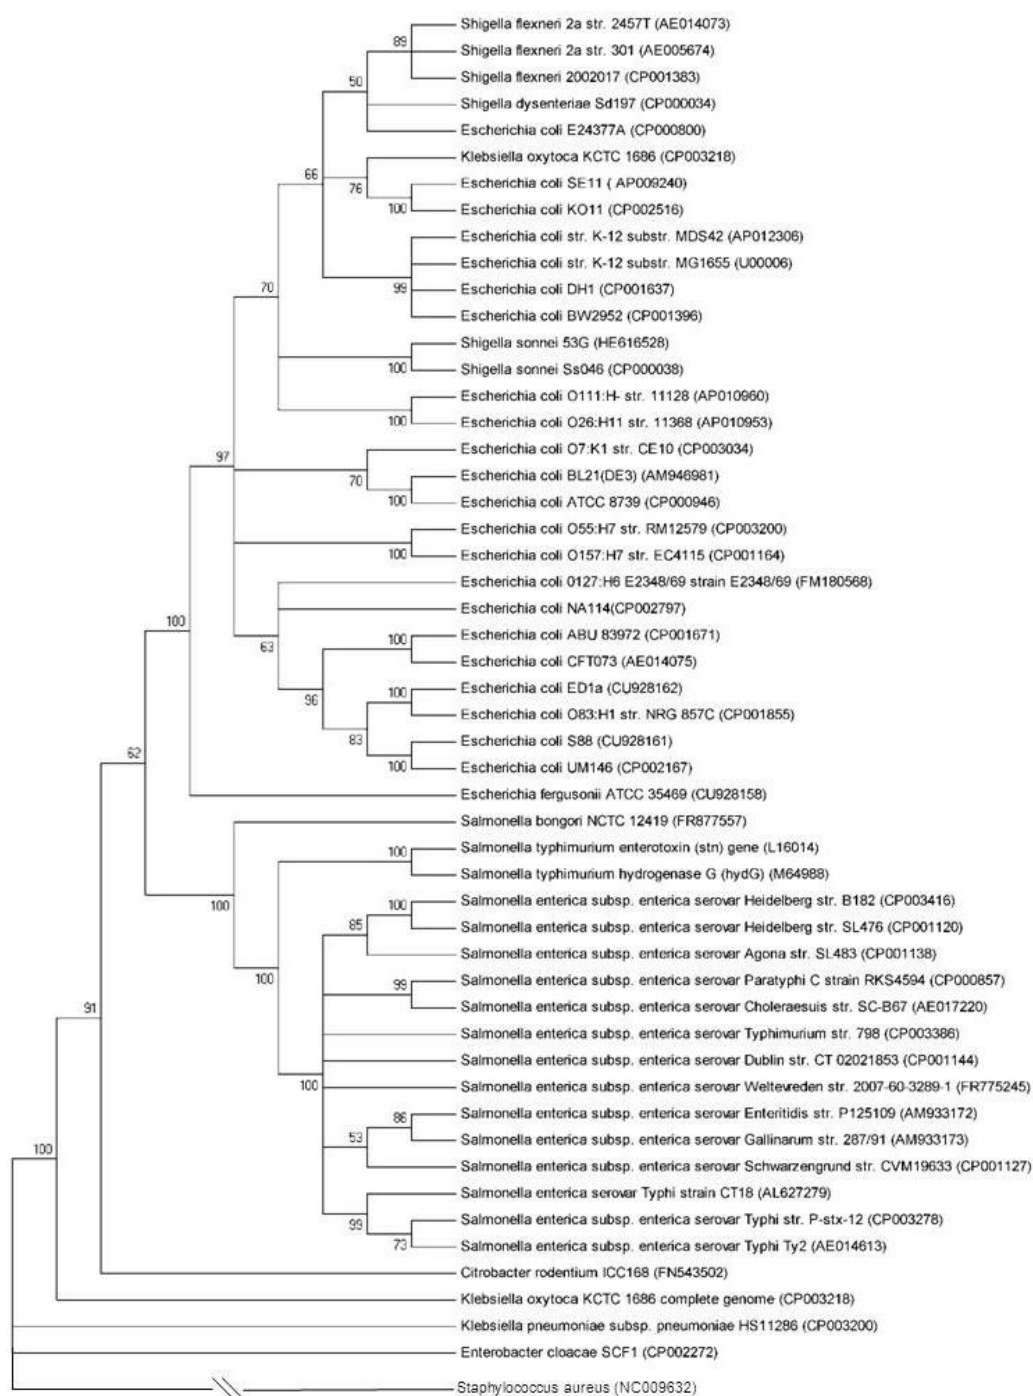

FIGURE S2

(A)

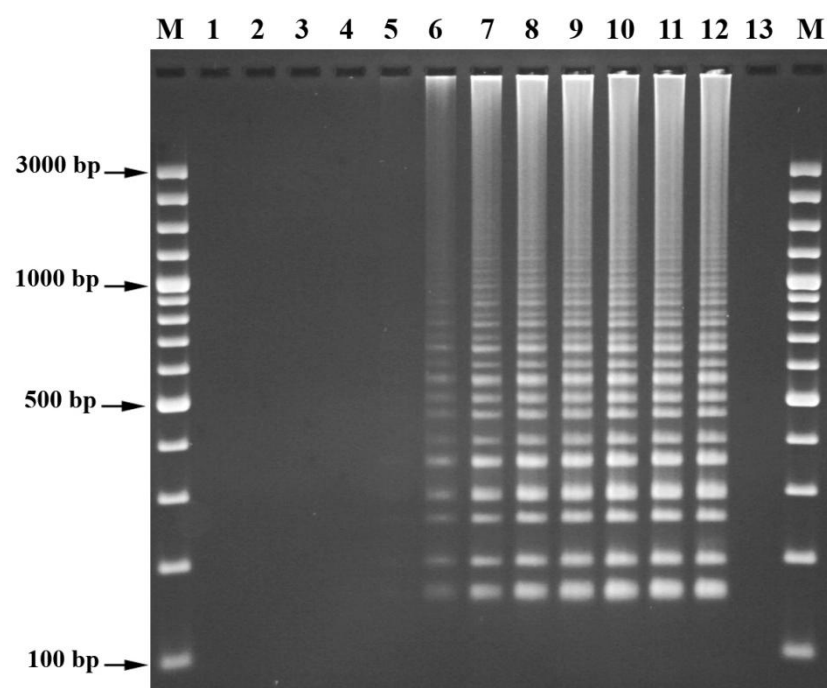

(B)

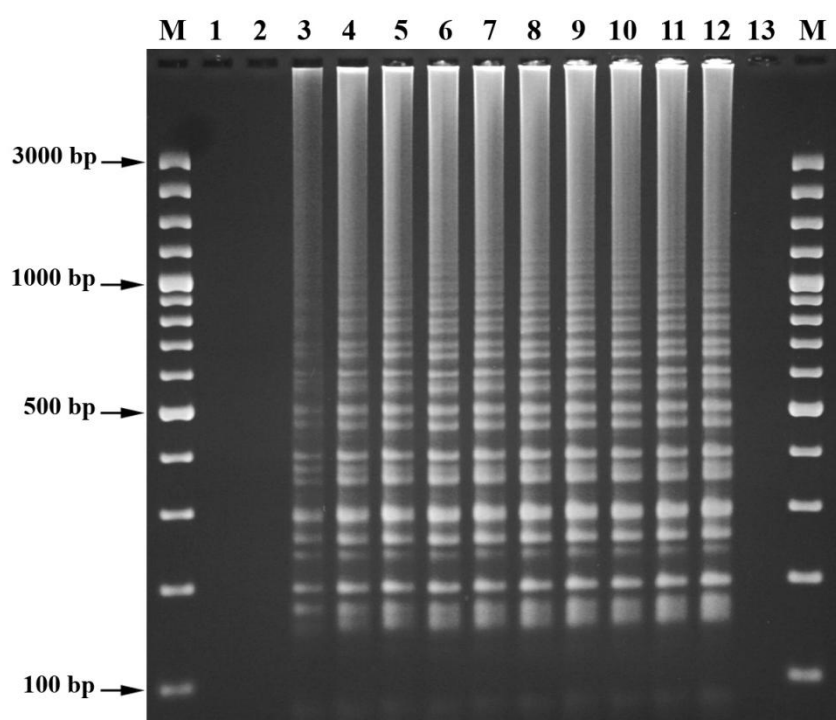

FIGURE S3



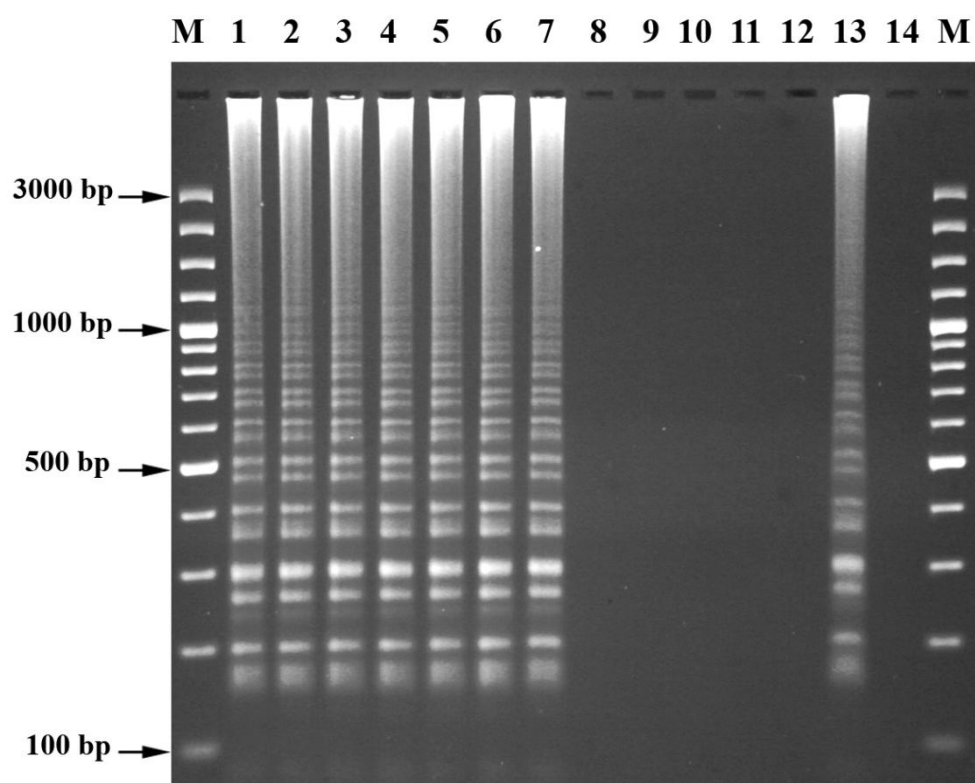

FIGURE S4

(A)

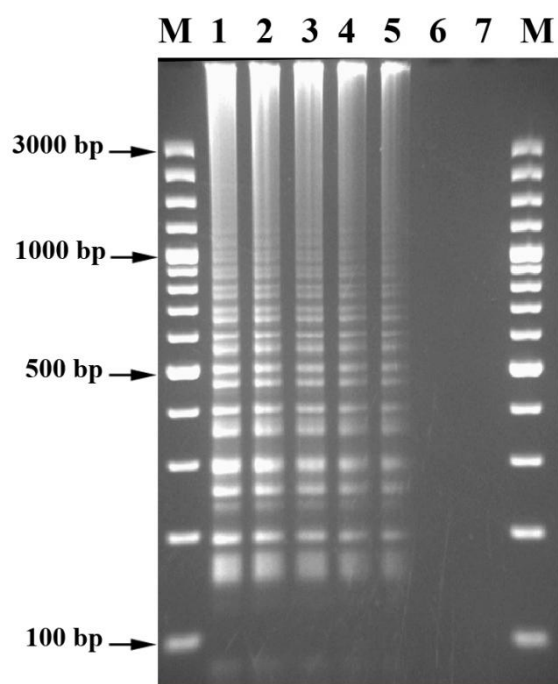

(B)

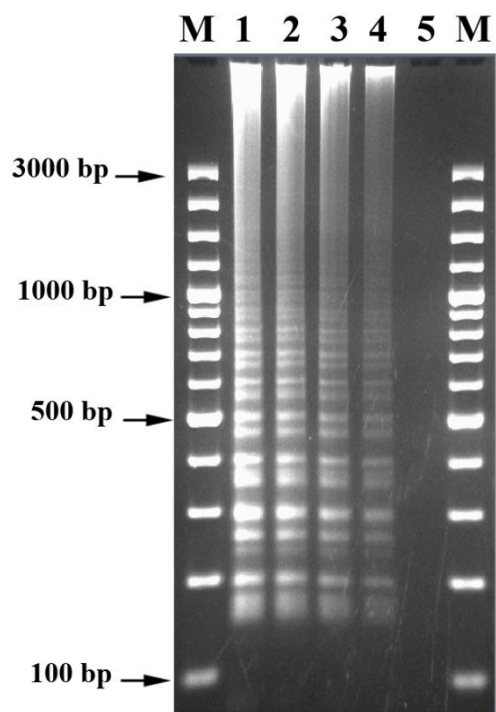

FIGURE S5
